# Supplementary material
Source: Frontiers journal article supplement (https://www.frontiersin.org/articles/349878)

## *Supplementary Material*

### **Long-term factors associated with falls and fractures post-stroke**

Emma J. Foster<sup>1</sup>, Raphae S. Barlas<sup>1</sup> MPH, Joao H. Bettencourt-Silva<sup>2,3</sup> PhD, Allan B. Clark<sup>3</sup> PhD, Anthony K. Metcalf<sup>2,3</sup> MBChB, Kristian M. Bowles<sup>2,3</sup> PhD, John F. Potter<sup>2,3</sup> DM, Phyto K. Myint<sup>1,3</sup> MD\*.

<sup>1</sup>Ageing Clinical & Experimental Research (ACER) Team, Institute of Applied Health Sciences, School of Medicine, Medical Sciences & Nutrition, University of Aberdeen, Aberdeen, UK

<sup>2</sup>Norfolk and Norwich University Hospital, Norwich, UK

<sup>3</sup>Norwich Cardiovascular Research Group, Norwich Medical School, University of East Anglia, Norwich Research Park, Norwich, UK

**\*Correspondence to:**

Phyto Kyaw Myint,  
Room 4:013 Polwarth Building,  
School of Medicine, Medical Sciences & Nutrition,  
University of Aberdeen, Foresterhill,  
Aberdeen, AB25 2ZD, UK  
Tel: +44 (0) 1224 437841  
Fax: +44 (0) 1224 437911  
Mail to: phyto.myint@abdn.ac.uk

Supplementary Fig. 1 – Displaying the process of data exclusion

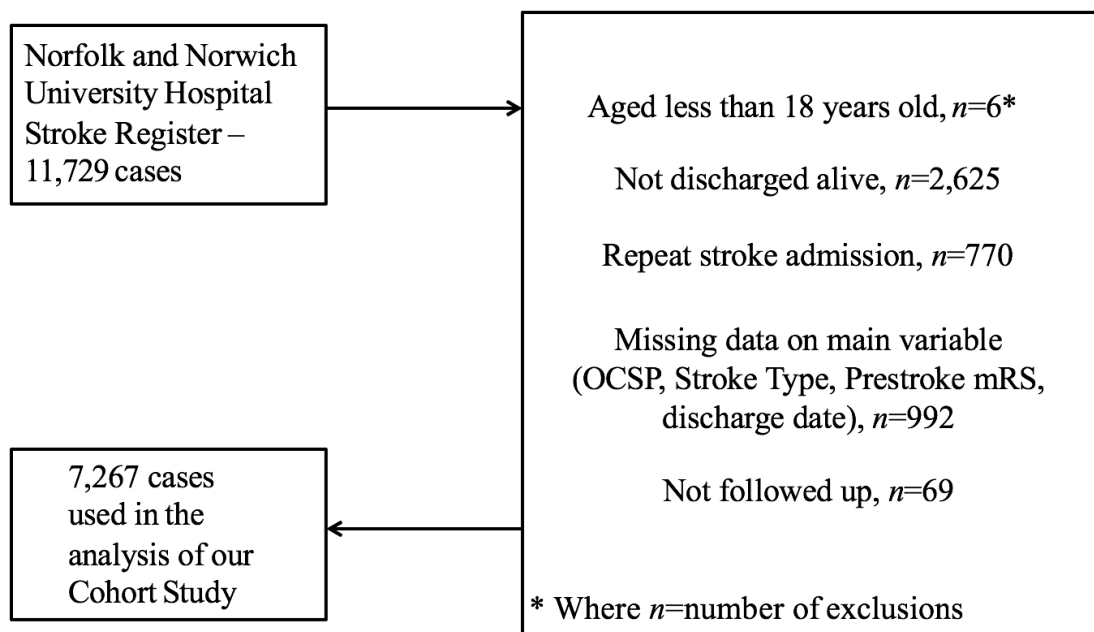

Supplement: Image_1.PDF [file Image_1.PDF]
